# Supplementary material
Source: Springer Nature journal article supplement (https://www.springermedizin.de/resource/supplementary/13041_2014_291_MOESM3_ESM.pdf/25657922)
Supplement: MOESM3 [file 25657922]

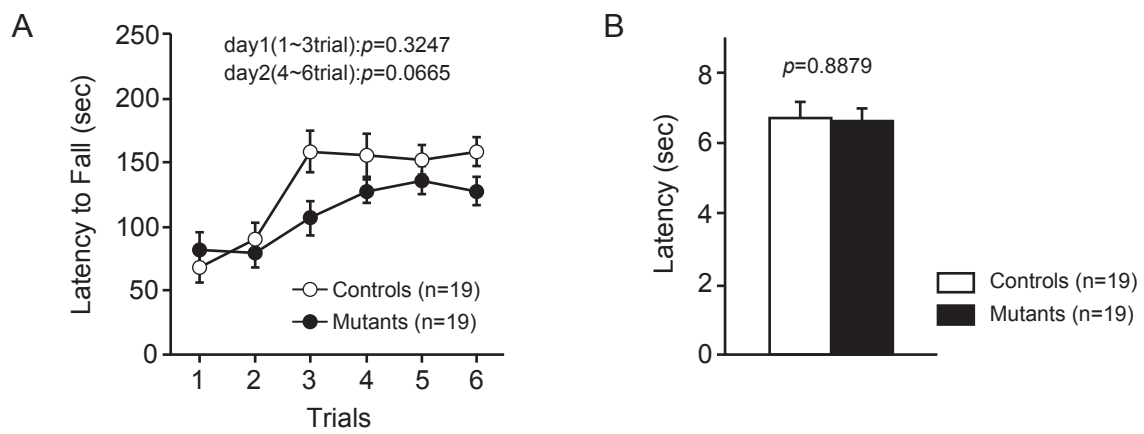

**Figure S3, Rotarod and hot plate tests performance.**

(A) In the rotarod task, the performance of the mutants was slightly worse than control mice, though this failed to reach significance (day1 (1~3trial):  $p=0.3247$ , day2 (4~6trial):  $p=0.0665$ ).

(B) In the hot plate test, there was no difference in the response latency between genotypes.
